# Supplementary material
Source: Springer Nature journal article supplement (https://www.springermedizin.de/resource/supplementary/12950_2010_168_MOESM6_ESM.pdf/9558110)

## Oral feG inhibits airway inflammation

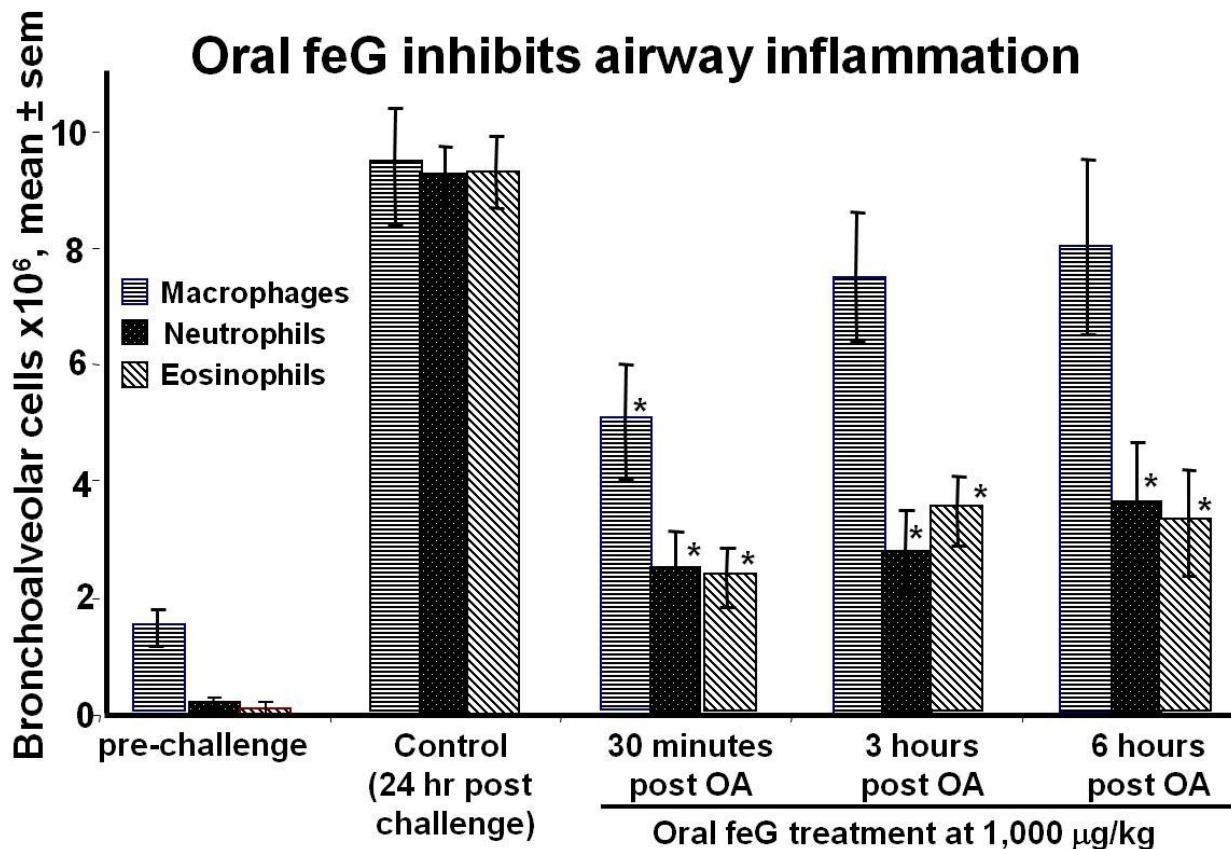

\*  $p < 0.05$   
vs control

Supplement: MOESM6 [file 9558110]
